# Supplementary material for: Environmental Risk of Pesticides for Fish in Small- and Medium-Sized Streams of Switzerland
Source: MDPI journal article supplement (doi:10.3390/toxics9040079), 2021-04-08
Supplement: s1 [file s1]

# Supplementary Materials: Environmental Risk of Pesticides for Fish in Small- and Medium-Sized Streams of Switzerland

Inge Werner, Anke Schneeweiss, Helmut Segner and Marion Junghans

**SI Table S1.** Sources of chemical-analytical data

**SI Table S2.** Acute effect values used in the fish-specific risk assessment (Excel-file: SI\_T\_S2)

**SI Table S3.** Chronic effect values used in the fish-specific risk assessment (Excel-file: SI\_T\_S3)

**SI Table S4.** Acute and chronic single substance and mixture risk quotients of pesticides detected in water samples of Swiss monitoring studies 2012-18 (Excel-file: SI\_T\_S4 RQmix)

**SI Table S5.** Effect values, MECs and mode of action of highly relevant substances

**SI Table S6.** Sublethal effect data for data-rich relevant pesticides

**SI Table S7.** Toxic effect data for data-rich relevant pesticides shown in Figure 3

**SI Table S8.** Acute toxicity data (96 h LC50) for data-rich relevant pesticides shown in SI Figure S2

**SI Table S9.** Fish species resident in small to medium-sized streams of Switzerland and their current status

**SI Figure S1.** Maximal cumulative ratios (MCR) as a function of the mixture risk quotient of pesticides detected in water samples from monitoring campaigns 2012-2018

**SI Figure S2.** Species sensitivity distributions (SSDs) of acute toxicity concentrations for data-rich relevant pesticides

**Table S1.** Sources of chemical-analytical data from monitoring studies conducted in Switzerland 2012–18.

| <b>Campaign</b>         | <b>Reference</b>       | <b>Link to data</b>                                                               |
|-------------------------|------------------------|-----------------------------------------------------------------------------------|
| NAWA 2012               | Moschet et al., 2014   | <a href="https://doi.org/10.1021/es500371t">https://doi.org/10.1021/es500371t</a> |
| NAWA 2015               | Spycher et al., 2018   | <a href="https://doi.org/10.25678/000022">https://doi.org/10.25678/000022</a>     |
| NAWA 2017               | Spycher et al., 2019   | <a href="https://doi.org/10.25678/0000GG">https://doi.org/10.25678/0000GG</a>     |
| Pyrethroids 2017 & 2018 | Rösch et al., 2019a, b | <a href="https://doi.org/10.25678/0001C7">https://doi.org/10.25678/0001C7</a>     |

**Table S5.** Effect values (in µg/L) for the most sensitive fish species (LC<sub>50</sub>, NOEC), highest environmental concentration (MEC<sub>max</sub>; in µg/L) and mode of action of highly relevant pesticides. 1) 14 d composite sample (chronic exposure); 2) 3–3.5 d (acute exposure) composite sample; an assessment factor of 10 was applied to the LC<sub>50</sub> and NOEC to derive acute and chronic PNECs, respectively. NA: not measured.

| Pesticide type | Fish-relevant substances | LC <sub>50</sub> | NOEC  | MEC <sub>max</sub><br>2012 <sup>1</sup> | MEC <sub>max</sub><br>2015 <sup>2</sup> | MEC <sub>max</sub><br>2015 <sup>1</sup> | MEC <sub>max</sub><br>2017 <sup>2</sup> | MEC <sub>max</sub><br>2017 <sup>1</sup> | MEC <sub>max</sub><br>2018 <sup>1</sup> | Primary mode of action                    |
|----------------|--------------------------|------------------|-------|-----------------------------------------|-----------------------------------------|-----------------------------------------|-----------------------------------------|-----------------------------------------|-----------------------------------------|-------------------------------------------|
| Insecticides   | Chlorpyrifos             | 1.3              | 0.14  | NA                                      | 0.039                                   | 0.01093                                 | 0.021                                   | 0.00855                                 | 0.0021                                  | Inhibition of acetylcholinesterase        |
|                | Chlorpyrifos-methyl      | 12.6             | 4.7   | NA                                      | 0.21                                    | 0.00975                                 | 0.063                                   | 0.01575                                 | 0.015                                   | Inhibition of acetylcholinesterase        |
|                | Diazinon                 | 90               | 2.4   | 0.043                                   | 0.59                                    | 0.06343                                 | 0.0068                                  | 0.0068                                  | NA                                      | Inhibition of acetylcholinesterase        |
|                | Cypermethrin             | 0.39             | 0.03  | NA                                      | NA                                      | NA                                      | 0.00098                                 | 0.00049                                 | 0.0038                                  | Disruption of sodium channels             |
|                | λ-Cyhalothrin            | 0.08             | 0.031 | NA                                      | NA                                      | NA                                      | 0.031                                   | 0.00775                                 | 0.00097                                 | Disruption of sodium channels             |
|                | Deltamethrin             | 0.15             | 0.017 | NA                                      | NA                                      | NA                                      | <LOQ                                    | 0.00                                    | 0.077                                   | Disruption of sodium channels             |
|                | Permethrin               | 1.5              | 0.66  | NA                                      | NA                                      | NA                                      | 0.00065                                 | 0.00016                                 | 0.019                                   | Disruption of sodium channels             |
| Herbicides     | Diuron                   | 500              | 33.4  | 0.052                                   | 3                                       | 1.27464                                 | 0.093                                   | 0.02325                                 | NA                                      | Photosynthesis II inhibition              |
|                | Linuron                  | 890              | 21    | 0.27                                    | 2.8                                     | 0.748                                   | 0.63                                    | 0.2295                                  | NA                                      | Photosynthesis II inhibition              |
|                | S-Metolachlor            | 3900             | 30    | 0.96                                    | 5                                       | 2.650                                   | 0.72                                    | 0.2785                                  | NA                                      | Inhibition of long-chain fatty acids      |
|                | Pendimethalin            | 138              | 6.3   | NA                                      | NA                                      | NA                                      | 0.48                                    | 0.181                                   | NA                                      | Inhibition of mitosis                     |
| Fungicides     | Carbendazim              | 7                | 11    | 0.065                                   | 0.5                                     | 0.35214                                 | 1.3                                     | 0.33648                                 | NA                                      | Damage to cytoskeleton and motor proteins |
|                | Epoxiconazole            | 3140             | 3     | 0.064                                   | 0.25                                    | 0.05448                                 | 0.33                                    | 0.10938                                 | NA                                      | Inhibition of sterole biosynthesis        |
|                | Fenpropimorph            | 2300             | 0.16  | 0.015                                   | 0.0015                                  | 0.00046                                 | 0.58                                    | 0.2                                     | NA                                      | Inhibition of sterole biosynthesis        |
|                | Fluazinam                | 55               | 2.9   | NA                                      | 0.024                                   | 0.00176                                 | 0.23                                    | 0.1                                     | NA                                      | Disruption of cellular respiration        |
|                | Fluopyram                | 980              | 135   | NA                                      | 6                                       | 2.81071                                 | 3                                       | 1.95                                    | NA                                      | Disruption of cellular respiration        |
|                | Pyraclostrobin           | 6                | 2     | 0.0605                                  | 0.0045                                  | 0.00056                                 | 0.0023                                  | 0.00105                                 | NA                                      | Disruption of cellular respiration        |
|                | Spiroxamine              | 2410             | 2     | 0.016                                   | 0.6                                     | 0.07507                                 | <LOQ                                    | <LOQ                                    | NA                                      | Inhibition of sterole biosynthesis        |

**Table S6.** Sublethal effect data for data-rich relevant pesticides. Data were selected based on environmental relevance in Swiss creeks ( $\leq \text{MEC}_{\text{max}}$  detected in monitoring studies 2012–18). No data was available in this concentration range for S-metolachlor, epoxiconazole, fenpropimorph, fluazinam, fluopyram, flusilazole, pyraclostrobin, spiroxamine and permethrin.

|              | Substance              | $MEC_{max}^1$<br>( $\mu\text{g/L}$ ) | $LOEC^2$ ( $\mu\text{g/L}$ )                                                               | Effect (exposure duration)                                                                                                         | Fish species and life stage                      | Reference                |
|--------------|------------------------|--------------------------------------|--------------------------------------------------------------------------------------------|------------------------------------------------------------------------------------------------------------------------------------|--------------------------------------------------|--------------------------|
| Insecticides | Chlorpyrifos           | 0.039                                | 0.002*                                                                                     | Altered mating behavior in males (1–2 d); reduced number and survival of offspring (14 d)                                          | <i>Poecilia reticulata</i> ; adult               | [1]                      |
|              |                        |                                      | 0.005                                                                                      | Reduced AChE <sup>3</sup> activity in head (4 d)                                                                                   | <i>Odontesthes bonariensis</i> ; larvae          | [2]                      |
|              | Diazinon               | 0.59                                 | 0.0036*                                                                                    | Reduced AChE activity; oxidative stress (5, 15, 30 d)                                                                              | <i>Cyprinus carpio</i>                           | [3]                      |
|              |                        |                                      | 0.3                                                                                        | Altered blood plasma hormone level, reduced level of expressible milt (5 d)                                                        | <i>Salmo salar</i> ; mature males                | [4]                      |
|              |                        |                                      | 0.47 <sup>s</sup>                                                                          | Reduced fecundity, females (108 d)                                                                                                 | <i>Cyprinodon variegatus</i> ; adult             | [5]                      |
|              |                        |                                      | 0.55                                                                                       | Reduced growth rate of offspring (6–8 mo)                                                                                          | <i>Salvelinus fontinalis</i> ; adult             | [6]                      |
|              | Cypermethrin           | 0.0038                               | <0.004                                                                                     | Reduced olfactory response to pheromone (PGF2 $\alpha$ ); Altered blood plasma hormone level, reduced priming effect on milt (5 d) | <i>Salmo salar</i> ; mature males                | [7]                      |
|              | $\lambda$ -Cyhalothrin | 0.031                                | 0.0004*                                                                                    | DNA damage in erythrocytes (1, 2 d)                                                                                                | <i>Gambusia affinis</i>                          | [8]                      |
|              |                        |                                      | 0.005*                                                                                     | Increased hematocrit; DNA damage in erythrocytes; reduced AChE and catalase activity (4 d)                                         | <i>Prochilodus lineatus</i> ; juvenile           | [9]                      |
|              | Herbicides             | Deltamethrin                         | 0.077                                                                                      | 0.060                                                                                                                              | Reduced plasma IgM (28 d)                        | <i>Gobiocypris rarus</i> |
| 0.035        |                        |                                      |                                                                                            | Reduced female wet weight in F0 generation (260 d)                                                                                 | <i>Pimephales promelas</i> ; complete life-cycle | [64]                     |
| Linuron      |                        | 2.8                                  | 0.049                                                                                      | Reduced dry weight (35 d)                                                                                                          | <i>Cyprinodon variegatus</i> ; eggs (24-48h old) | [64]                     |
|              |                        |                                      | 1.0                                                                                        | Reduced vitellogenin concentration in females (21 d)                                                                               | <i>Pimephales promelas</i> ; adult               | [10]                     |
|              |                        |                                      | 1.7                                                                                        | Changes in gene expression (lipid and steroid biosynthesis; cellular stress) (4 d)                                                 | <i>Salmo trutta</i> ; mature males               | [11]                     |
| Diuron       | 3                      | 0.057                                | Oxidative stress; altered activity of biotransformation enzymes (7 d)                      | <i>Oreochromis niloticus</i> ; mature males                                                                                        | [12]                                             |                          |
|              |                        | 0.1                                  | Reduction of primary ovarian follicles (25 d)                                              | <i>Oreochromis niloticus</i> ; mature females                                                                                      | [13]                                             |                          |
|              |                        | 0.1                                  | Reduced growth and condition factor; changes in thyroid hormone levels (15 d)              | <i>Menidia beryllina</i> ; juvenile                                                                                                | [14]                                             |                          |
|              |                        | 0.2                                  | Reduction in blood plasma testosterone levels (25 d)                                       | <i>Oreochromis niloticus</i> ; mature males                                                                                        | [15]                                             |                          |
|              |                        | 0.2                                  | Changes in gene expression of vitellogenin and activity of cytochrome P450 aromatase (7 d) | <i>Oreochromis mossambica</i> ; juvenile, male                                                                                     | [16]                                             |                          |

|            |                |      |      |                                                                                                                                                    |                                  |         |
|------------|----------------|------|------|----------------------------------------------------------------------------------------------------------------------------------------------------|----------------------------------|---------|
| Fungicides | Pendime-thalin | 0.48 | 1    | Increase of micronuclei in erythrocytes, DNA damage in liver cells and spermatocytes (14, 21 d)                                                    | <i>Danio rerio</i> ; adult, male | [17]    |
|            |                |      | 0.5  | Reduced antioxidant defense in gill and liver (28 d)                                                                                               | <i>Oncorhynchus mykiss</i>       | [18]    |
|            |                |      | 0.5  | Changes in adrenaline level, AChE activity, Na <sup>+</sup> /K <sup>+</sup> -ATPase activity, monoaminoxidase activity, and oxidative stress (4 d) | <i>Channa punctata</i>           | [19,20] |
|            | Carbendazim    | 0.5  | 0.16 | Changes in swimming behavior (5 d)                                                                                                                 | <i>Danio rerio</i> ; larvae      | [21]    |
|            | Azoxystrobin   | 3    | 0.1  | Changes in gene expression (oxidative stress, endocrine disruption, immune response) (1, 2, 3 d)                                                   | <i>Danio rerio</i> ; larvae      | [22]    |
|            |                |      | 0.25 | Changes in anti-oxidative and detoxification enzyme activity/malondialdehyde concentration in liver (7, 14, 21, 28 d)                              | <i>Danio rerio</i> ; adult       | [23]    |
|            |                |      | 0.5  | Increase of micronuclei in erythrocytes, DNA damage in liver cells and spermatocytes (7, 14, 21 d)                                                 | <i>Danio rerio</i> ; adult, male | [17]    |
|            |                |      | 1    | Oxidative stress and genotoxicity in liver (7, 14, 21, 28 d)                                                                                       | <i>Danio rerio</i> ; adult       | [24]    |
|            |                |      | 2    | Changes in gene expression of <i>cyp11a</i> , <i>hsd3b</i> , <i>cyp19a</i> in gonads, <i>vtg1</i> , <i>vtg2</i> in liver (21 d)                    | <i>Danio rerio</i> ; adult, male | [25]    |

<sup>1</sup> MEC<sub>max</sub> from NAWA SPEZ monitoring studies 2015-18; <sup>2</sup> lowest effect concentration; <sup>3</sup> AChE – acetyl cholinesterase; \* pesticide applied as product formulation; <sup>§</sup> in saltwater.

**Table S7.** Toxic effect data for data-rich relevant pesticides shown in Figure 3. LC50: 50% survival after 96 h; NOEC: reduced growth, impaired development or reproduction after ≥28 d; sublethal: non-apical sublethal effects.

| Substance | Effect category | Effect concentration (µg/L) | Reference |
|-----------|-----------------|-----------------------------|-----------|
| Linuron   | sublethal       | 1                           | [10]      |
| Linuron   | sublethal       | 1.7                         | [11]      |
| Linuron   | sublethal       | 30                          | [26]      |
| Linuron   | sublethal       | 31.5                        | [27]      |
| Linuron   | sublethal       | 10                          | [28]      |
| Linuron   | sublethal       | 30                          | [29]      |
| Linuron   | LC50            | 2900                        | [30]      |
| Linuron   | LC50            | 3100                        | [30]      |
| Linuron   | LC50            | 8600                        | [30]      |
| Linuron   | LC50            | 9600                        | [30]      |
| Linuron   | LC50            | 890                         | [30]      |
| Linuron   | NOEC            | 21                          | [30]      |
| Diuron    | sublethal       | 0.1                         | [14]      |
| Diuron    | sublethal       | 78                          | [31]      |
| Diuron    | sublethal       | 0.057                       | [12]      |
| Diuron    | sublethal       | 0.2                         | [15]      |
| Diuron    | sublethal       | 5                           | [34]      |
| Diuron    | sublethal       | 0.1                         | [13]      |
| Diuron    | LC50            | 500                         | [30]      |
| Diuron    | LC50            | 710                         | [30]      |
| Diuron    | LC50            | 1100                        | [30]      |
| Diuron    | LC50            | 2800                        | [30]      |
| Diuron    | LC50            | 6300                        | [30]      |
| Diuron    | LC50            | 6700                        | [30]      |
| Diuron    | LC50            | 7700                        | [30]      |
| Diuron    | LC50            | 7800                        | [30]      |
| Diuron    | LC50            | 14700                       | [30]      |
| Diuron    | NOEC            | 33.4                        | [30]      |
| Diuron    | NOEC            | 220                         | [30]      |
| Diuron    | NOEC            | 410                         | [30]      |
| Diazinon  | sublethal       | 0.3                         | [4]       |
| Diazinon  | sublethal       | 0.47                        | [5]       |
| Diazinon  | sublethal       | 0.55                        | [6]       |
| Diazinon  | sublethal       | 2.9                         | [33]      |
| Diazinon  | sublethal       | 0.0036                      | [3]       |
| Diazinon  | sublethal       | 45                          | [34]      |
| Diazinon  | sublethal       | 60                          | [35]      |
| Diazinon  | sublethal       | 0.675                       | [36]      |
| Diazinon  | sublethal       | 1                           | [37]      |
| Diazinon  | sublethal       | 100                         | [38]      |
| Diazinon  | LC50            | 90                          | [14]      |
| Diazinon  | LC50            | 168                         | [30]      |
| Diazinon  | LC50            | 770                         | [30]      |
| Diazinon  | LC50            | 1470                        | [30]      |
| Diazinon  | LC50            | 1600                        | [30]      |
| Diazinon  | LC50            | 4300                        | [30]      |
| Diazinon  | LC50            | 8900                        | [30]      |
| Diazinon  | NOEC            | 200                         | [30]      |
| Diazinon  | NOEC            | 16.5                        | [30]      |

|              |           |        |      |
|--------------|-----------|--------|------|
| Diazinon     | NOEC      | 2.4    | [30] |
| Cypermethrin | sublethal | 0.1    | [7]  |
| Cypermethrin | sublethal | 0.15   | [39] |
| Cypermethrin | sublethal | 0.4    | [40] |
| Cypermethrin | sublethal | 0.443  | [41] |
| Cypermethrin | sublethal | 0.004  | [7]  |
| Cypermethrin | sublethal | 0.04   | [42] |
| Cypermethrin | sublethal | 0.16   | [43] |
| Cypermethrin | LC50      | 0.4    | [30] |
| Cypermethrin | LC50      | 0.43   | [30] |
| Cypermethrin | LC50      | 1.2    | [30] |
| Cypermethrin | LC50      | 2.1    | [30] |
| Cypermethrin | LC50      | 1.47   | [30] |
| Cypermethrin | LC50      | 1.98   | [30] |
| Cypermethrin | LC50      | 0.71   | [30] |
| Cypermethrin | LC50      | 1.77   | [30] |
| Cypermethrin | LC50      | 1.11   | [30] |
| Cypermethrin | LC50      | 0.39   | [30] |
| Cypermethrin | LC50      | 3.82   | [30] |
| Cypermethrin | LC50      | 1.37   | [30] |
| Cypermethrin | LC50      | 2.4    | [30] |
| Cypermethrin | NOEC      | 2.79   | [30] |
| Cypermethrin | NOEC      | 0.03   | [30] |
| Cypermethrin | NOEC      | 0.077  | [30] |
| Cypermethrin | NOEC      | 0.37   | [30] |
| Cyhalothrin  | sublethal | 1      | [44] |
| Cyhalothrin  | sublethal | 0.0004 | [8]  |
| Cyhalothrin  | sublethal | 0.005  | [9]  |
| Cyhalothrin  | sublethal | 0.15   | [45] |
| Cyhalothrin  | sublethal | 0.65   | [46] |
| Cyhalothrin  | sublethal | 0.8    | [47] |
| Cyhalothrin  | sublethal | 0.3    | [48] |
| Cyhalothrin  | LC50      | 0.078  | [30] |
| Cyhalothrin  | LC50      | 0.16   | [30] |
| Cyhalothrin  | LC50      | 0.21   | [30] |
| Cyhalothrin  | LC50      | 0.24   | [30] |
| Cyhalothrin  | LC50      | 0.49   | [30] |
| Cyhalothrin  | LC50      | 0.78   | [30] |
| Cyhalothrin  | LC50      | 1.6    | [30] |
| Cyhalothrin  | LC50      | 0.7    | [30] |
| Cyhalothrin  | LC50      | 0.807  | [30] |
| Cyhalothrin  | NOEC      | 0.031  | [30] |
| Cyhalothrin  | NOEC      | 0.25   | [30] |
| Chlorpyrifos | sublethal | 0.002  | [1]  |
| Chlorpyrifos | sublethal | 0.12   | [49] |
| Chlorpyrifos | sublethal | 0.661  | [50] |
| Chlorpyrifos | sublethal | 0.88   | [51] |
| Chlorpyrifos | sublethal | 1.2    | [52] |
| Chlorpyrifos | sublethal | 0.005  | [2]  |
| Chlorpyrifos | sublethal | 0.6    | [53] |
| Chlorpyrifos | sublethal | 0.625  | [54] |
| Chlorpyrifos | sublethal | 1      | [55] |
| Chlorpyrifos | sublethal | 0.661  | [56] |

|              |           |      |      |
|--------------|-----------|------|------|
| Chlorpyrifos | sublethal | 1.16 | [57] |
| Chlorpyrifos | sublethal | 2.25 | [58] |
| Chlorpyrifos | LC50      | 1.3  | [30] |
| Chlorpyrifos | LC50      | 1.3  | [30] |
| Chlorpyrifos | LC50      | 1.7  | [30] |
| Chlorpyrifos | LC50      | 1.78 | [30] |
| Chlorpyrifos | LC50      | 4.2  | [30] |
| Chlorpyrifos | LC50      | 4.7  | [30] |
| Chlorpyrifos | LC50      | 8.5  | [29] |
| Chlorpyrifos | LC50      | 8.5  | [30] |
| Chlorpyrifos | LC50      | 10   | [30] |
| Chlorpyrifos | LC50      | 12.5 | [30] |
| Chlorpyrifos | LC50      | 130  | [30] |
| Chlorpyrifos | LC50      | 136  | [30] |
| Chlorpyrifos | LC50      | 250  | [30] |
| Chlorpyrifos | LC50      | 250  | [30] |
| Chlorpyrifos | LC50      | 520  | [30] |
| Chlorpyrifos | LC50      | 806  | [30] |
| Chlorpyrifos | NOEC      | 0.27 | [30] |
| Chlorpyrifos | NOEC      | 0.75 | [30] |
| Chlorpyrifos | NOEC      | 0.28 | [30] |
| Chlorpyrifos | NOEC      | 0.38 | [30] |
| Chlorpyrifos | NOEC      | 0.51 | [30] |
| Chlorpyrifos | NOEC      | 5    | [30] |
| Carbendazim  | sublethal | 4    | [59] |
| Carbendazim  | sublethal | 20   | [59] |
| Carbendazim  | sublethal | 0.16 | [21] |
| Carbendazim  | LC50      | 440  | [30] |
| Carbendazim  | LC50      | 1080 | [30] |
| Carbendazim  | LC50      | 7    | [30] |
| Carbendazim  | LC50      | 100  | [30] |
| Carbendazim  | LC50      | 390  | [30] |
| Carbendazim  | NOEC      | 11   | [30] |
| Azoxytrobin  | sublethal | 0.1  | [22] |
| Azoxytrobin  | sublethal | 0.25 | [23] |
| Azoxytrobin  | sublethal | 0.5  | [17] |
| Azoxytrobin  | sublethal | 1    | [24] |
| Azoxytrobin  | sublethal | 2    | [25] |
| Azoxytrobin  | sublethal | 10   | [60] |
| Azoxytrobin  | sublethal | 20   | [61] |
| Azoxytrobin  | sublethal | 200  | [62] |
| Azoxytrobin  | LC50      | 470  | [30] |
| Azoxytrobin  | LC50      | 1100 | [30] |
| Azoxytrobin  | LC50      | 1380 | [30] |
| Azoxytrobin  | LC50      | 1600 | [30] |
| Azoxytrobin  | LC50      | 1650 | [30] |
| Azoxytrobin  | NOEC      | 147  | [30] |



## References for SI Tables 6, 7

- De Silva, P.; Samayawardhena, L. Effects of chlorpyrifos on reproductive performances of guppy (*Poecilia reticulata*). *Chemosphere* **2005**, *58*, 1293–1299.
- Aca, V.L.; González, P.V.; Carriquiriborde, P. Lethal and sublethal responses in the fish, *Odontesthes bonariensis*, exposed to chlorpyrifos alone or under mixtures with endosulfan and lambda-cyhalothrin. *Ecotoxicology* **2018**, *27*, 968–979.
- Oruç, E.; Usta, D. Evaluation of oxidative stress responses and neurotoxicity potential of diazinon in different tissues of *Cyprinus carpio*. *Environ. Toxicol. Pharmacol.* **2007**, *23*, 48–55.
- Moore, A.; Waring, C.P. Sublethal effects of the pesticide diazinon on olfactory function in mature male *Atlantic salmon* parr. *J. Fish Biol.* **1996**, *48*, 758–775.
- Goodman, L.R.; Hansen, D.J.; Coppage, D.L.; Moore, J.C.; Matthews, E. Diazinon: Chronic Toxicity to, and Brain Acetylcholinesterase Inhibition in, the Sheepshead Minnow, *Cyprinodon variegatus*. *Trans. Am. Fish. Soc.* **1979**, *108*, 479–488.
- Allison, D.T.; Hermanutz, R.O. *Toxicity of Diazinon to Brook Trout and Fathead Minnows*; Environmental Protection Agency, Office of Research and Development: Duluth, MN, USA, 1977.
- Moore, A.; Waring, C.P. The effects of a synthetic pyrethroid pesticide on some aspects of reproduction in *Atlantic salmon* (*Salmo salar* L.). *Aquat. Toxicol.* **2001**, *52*, 1–12.
- Muranli, F.D.G.; Güner, U. Induction of micronuclei and nuclear abnormalities in erythrocytes of mosquito fish (*Gambusia affinis*) following exposure to the pyrethroid insecticide lambda-cyhalothrin. *Mutat. Res. Toxicol. Environ. Mutagen.* **2001**, *726*, 104–108.
- Vieira, C.E.D.; Dos Reis Martinez, C.B. The pyrethroid  $\lambda$ -cyhalothrin induces biochemical, genotoxic, and physiological alterations in the teleost *Prochilodus lineatus*. *Chemosphere* **2018**, *210*, 958–967.
- Marlatt, V.L.; Lo, B.P.; Ornostay, A.; Hogan, N.S.; Kennedy, C.J.; Elphick, J.R.; Martyniuk, C.J. The effects of the urea-based herbicide linuron on reproductive endpoints in the fathead minnow (*Pimephales promelas*). *Comp. Biochem. Physiol. C* **2013**, *157*, 24–32.
- Webster, T.M.U.; Perry, M.H.; Santos, E.M. The herbicide linuron inhibits cholesterol biosynthesis and induces cellular stress responses in brown trout. *Environ. Sci. Technol.* **2015**, *49*, 3110–3118.
- Felício, A.A.; Freitas, J.S.; Scarin, J.B.; Onde, L.D.S.; Teresa, F.B.; Schlenk, D.; de Almeida, E.A. Isolated and mixed effects of diuron and its metabolites on biotransformation enzymes and oxidative stress response of Nile tilapia (*Oreochromis niloticus*). *Ecotoxicol. Environ. Saf.* **2018**, *149*, 248–256.
- Pereira, T.S.B.; Boscolo, C.N.P.; Felício, A.A.; Batlouni, S.R.; Schlenk, D.; de Almeida, E.A. Estrogenic activities of diuron metabolites in female Nile tilapia (*Oreochromis niloticus*). *Chemosphere* **2016**, *146*, 497–502.
- Moreira, L.B.; Diamante, G.; Giroux, M.; Coffin, S.; Xu, E.G.; Abessa, D.M.D.S.; Schlenk, D. Impacts of Salinity and Temperature on the Thyroidogenic Effects of the Biocide Diuron in *Menidia beryllina*. *Environ. Sci. Technol.* **2018**, *52*, 3146–3155.
- Pereira, T.S.B.; Boscolo, C.N.P.; da Silva, D.G.H.; Batlouni, S.R.; Schlenk, D.; de Almeida, E.A. Anti-androgenic activities of diuron and its metabolites in male Nile tilapia (*Oreochromis niloticus*). *Aquat. Toxicol.* **2015**, *164*, 10–15.
- Felício, A.A.; Crago, J.; Maryoung, L.A.; Almeida, E.A.; Schlenk, D. Effects of alkylphenols on the biotransformation of diuron and enzymes involved in the synthesis and clearance of sex steroids in juvenile male tilapia (*Oreochromis mossambica*). *Aquat. Toxicol.* **2016**, *180*, 345–352.
- Bony, S.; Gaillard, I.; Devaux, A. Genotoxicity assessment of two vineyard pesticides in zebrafish. *Int. J. Environ. Anal. Chem.* **2010**, *90*, 421–428.
- Danion, M.; Le Floch, S.; Lamour, F.; Quentel, C. Effects of in vivo chronic exposure to pendimethalin on EROD activity and antioxidant defenses in rainbow trout (*Oncorhynchus mykiss*). *Ecotoxicol. Environ. Saf.* **2014**, *99*, 21–27.
- Tabassum, H.; Afjal, M.A.; Khan, J.; Raisuddin, S.; Parvez, S. Neurotoxicological assessment of pendimethalin in freshwater fish *Channa punctata* Bloch. *Ecol. Indic.* **2015**, *58*, 411–417.
- Tabassum, H.; Ashfaq, M.; Khan, J.; Shah, Z.; Raisuddin, S.; Parvez, S. Short term exposure of pendimethalin induces biochemical and histological perturbations in liver, kidney and gill of freshwater fish. *Ecol. Indic.* **2016**, *63*, 29–36.
- Andrade, T.S.; Henriques, J.F.; Almeida, A.R.; Machado, A.L.; Koba, O.; Giang, P.T.; Soares, A.M.; Domingues, I. Carbendazim exposure induces developmental, biochemical and behavioural disturbance in zebrafish embryos. *Aquat. Toxicol.* **2016**, *170*, 390–399.
- Jiang, J.; Shi, Y.; Yu, R.; Chen, L.; Zhao, X. Biological response of zebrafish after short-term exposure to azoxystrobin. *Chemosphere* **2018**, *202*, 56–64.
- Jia, W.; Mao, L.; Zhang, L.; Zhang, Y.; Jiang, H. Effects of two strobilurins (azoxystrobin and picoxystrobin) on embryonic development and enzyme activities in juveniles and adult fish livers of zebrafish (*Danio rerio*). *Chemosphere* **2018**, *207*, 573–580.
- Han, Y.; Liu, T.; Wang, J.; Wang, J.; Zhang, C.; Zhu, L. Genotoxicity and oxidative stress induced by the fungicide azoxystrobin in zebrafish (*Danio rerio*) livers. *Pestic. Biochem. Physiol.* **2016**, *133*, 13–19.
- Cao, F.; Zhu, L.; Li, H.; Yu, S.; Wang, C.; Qiu, L. Reproductive toxicity of azoxystrobin to adult zebrafish (*Danio rerio*). *Environ. Pollut.* **2016**, *219*, 1109–1121.
- Oulmi, Y.; Braunbeck, T. Cytopathology of liver and in rainbow trout *Oncorhynchus mykiss* after long-term exposure to sublethal concentrations of linuron. *Dis. Aquat. Org.* **1995**, *21*, 35–52, doi:10.3354/dao021035.
- Lutnicka, H.; Bartosz Bojarski, B.; Witeska, M.; Tombarkiewicz, B.; Formicki, G. Exposure to herbicide linuron results in alterations in hematological profile and stress biomarkers of common carp (*Cyprinus carpio*). *Ecotoxicology* **2019**, *28*, 69–75, doi:10.1007/s10646-018-2000-y.

28. Tierney, K.B.; Ross, P.S.; Kennedy, C.J. Linuron and carbaryl differentially impair baseline amino acid and bile salt olfactory responses in three salmonids. *Toxicology* **2007**, *231*, 175–187.
29. Topal, A.; Alak, G.; Altun, S.; Erol, H.S.; Atamanalp, M. Evaluation of 8-hydroxy-2-deoxyguanosine and NFkB activation, oxidative stress response, acetylcholinesterase activity, and histopathological changes in rainbow trout brain exposed to linuron. *Environ. Toxicol. Pharmacol.* **2017**, *49*, 14–20.
30. Dossier, Ecotox Centre, Dübendorf, Switzerland. Data Can Be Obtained upon Request from info@oekotoxzentrum.ch. Available online: <https://www.oekotoxzentrum.ch> (accessed on 7 February 2020).
31. Call, D.J.; Brooke, L.T.; Kent, R.J.; Knuth, M.L.; Poirier, S.H.; Huot, J.M.; Lima, A.R. Bromacil and diuron herbicides: Toxicity, uptake, and elimination in freshwater fish. *Arch. Environ. Contam. Toxicol.* **1987**, *16*, 607–613, doi:10.1007/BF01055817.
32. Saglio, P.; Trijasse, S. Behavioral responses to atrazine and diuron in goldfish. *Arch. Environ. Contam. Toxicol.* **1998**, *35*, 484–491.
33. Flynn, K.; Lothenbach, D.; Whiteman, F.; Hammermeister, D.; Swintek, J.; Etterson, M.; Johnson, R. The effects of continuous diazinon exposure on growth and reproduction in Japanese medaka using a modified Medaka Extended One Generation Reproduction Test (MEOGRT). *Ecotoxicol. Environ. Saf.* **2018**, *162*, 438–445.
34. Dutta, H.M.; Qadri, N.; Ojha, J.; Singh, N.K.; Adhikari, S.; Munshi, J.D.; Roy, P.K. Effect of diazinon on macrophages of bluegill sunfish, *Lepomis macrochirus*: A cytochemical evaluation. *Bull. Environ. Contam. Toxicol.* **1997**, *58*, 135–141.
35. Banaee, M.; Mir, V.A.; Rafei, G.R.; Majazi, A.B. Effect of sub-lethal diazinon concentrations on blood plasma biochemistry. *Int. J. Environ. Res.* **2008**, *2*, 189–198.
36. Abtahi, B.; Nabavi, H.; Jafari-Shamushaki, V.; Gorbani, R.; Kasumyan, A.O. Influence of insecticides diazinon and endosulfan on taste reception in Persian sturgeon *Acipenser persicus* (Acipenseridae). *J. Appl. Ichthyol.* **2018**, *58*, 248–254.
37. Scholz, N.L.; Truelove, N.K.; French, B.L.; Berejikian, B.A.; Quinn, T.P.; Casillas, E.; Collier, T.K. Diazinon disrupts antipredator and homing behaviors in chinook salmon (*Oncorhynchus tshawytscha*). *Can. J. Fish. Aquat.* **2000**, *57*, 1911–1918.
38. Banaee, M.; Sureda, A.; Mirvaghefi, A.R.; Ahmadi, K. Effects of diazinon on biochemical parameters of blood in rainbow trout (*Oncorhynchus mykiss*). *Pestic. Biochem. Physiol.* **2011**, *99*, 1–6.
39. Poletta, G.L.; Gigena, F.; Loteste, A.; Parma, M.J.; Kleinsorge, E.C.; Simoniello, M.F. Comet assay in gill cells of *Prochilodus lineatus* exposed in vivo to cypermethrin. *Pestic. Biochem. Physiol.* **2013**, *107*, 385–390.
40. Ansari, R.A.; Rahman, S.; Kaur, M.; Anjum, S.; Raisuddin, S. In vivo cytogenetic and oxidative stress-inducing effects of cypermethrin in freshwater fish, *Channa punctata* Bloch. *Ecotoxicol. Environ. Saf.* **2011**, *74*, 150–156.
41. Vani, T.; Saharan, N.; Roy, S.D.; Ranjan, R.; Pal, A.K.; Siddaiah, G.M.; Kumar, R. Alteration in haematological and biochemical parameters of *Catla catla* exposed to sub-lethal concentration of cypermethrin. *Fish Physiol. Biochem.* **2012**, *38*, 1577–1584.
42. Bonansea, R.I.; Wunderlin, D.A.; Amé, M.V. (2016). Behavioral swimming effects and acetylcholinesterase activity changes in *Jenynsia multidentata* exposed to chlorpyrifos and cypermethrin individually and in mixtures. *Ecotoxicol. Environ. Saf.* **2016**, *129*, 311–319.
43. Sarkar, B.; Chatterjee, A.; Adhikari, S.; Ayyappan, S. Carbofuran and cypermethrin-induced histopathological alterations in the liver of *Labeo rohita* (Hamilton) and its recovery. *J. Appl. Ichthyol.* **2005**, *21*, 131–135.
44. Tu, W.; Xu, C.; Lu, B.; Lin, C.; Wu, Y.; Liu, W. Acute exposure to synthetic pyrethroids causes bioconcentration and disruption of the hypothalamus–pituitary–thyroid axis in zebrafish embryos. *Sci. Total Environ.* **2016**, *542*, 876–885.
45. Alvim, T.T.; dos Reis Martinez, C.B. Genotoxic and oxidative damage in the freshwater teleost *Prochilodus lineatus* exposed to the insecticides lambda-cyhalothrin and imidacloprid alone and in combination. *Mutat. Res.-Gen. Toxicol. Environ.* **2019**, *842*, 85–93.
46. Venturini, F.P.; de Moraes, F.D.; Rossi, P.A.; Avilez, I.M.; Shiogiri, N.S.; Moraes, G. A multi-biomarker approach to lambda-cyhalothrin effects on the freshwater teleost *Brycon amazonicus*: Single-pulse exposure and recovery. *Fish Physiol. Biochem.* **2019**, *45*, 341–353.
47. Kumar, A.; Rai, D.K.; Sharma, B.; Pandey, R.S. λ-cyhalothrin and cypermethrin induced in vivo alterations in the activity of acetylcholinesterase in a freshwater fish, *Channa punctatus* (Bloch). *Pestic. Biochem. Physiol.* **2009**, *93*, 96–99.
48. Velmurugan, B.; Selvanayagam, M.; Cengiz, E.I.; Unlu, E. Histopathology of lambda-cyhalothrin on tissues (gill, kidney, liver and intestine) of *Cirrhinus mrigala*. *Environ. Toxicol. Pharmacol.* **2007**, *24*, 286–291.
49. Jarvinen, A.W.; Nordling, B.R.; Henry, M.E. Chronic toxicity of Dursban (chlorpyrifos) to the fathead minnow (*Pimephales promelas*) and the resultant acetylcholinesterase inhibition. *Ecotoxicol. Environ. Saf.* **1983**, *7*, 423–434.
50. Raibeemol, K.P.; Chitra, K.C. Effects of chlorpyrifos as inducer for oxidative stress in liver, kidney and spleen of freshwater fish, *Pseudotropheus maculatus* (Bloch, 1795). *Res. Rev. J. Toxicol.* **2018**, *8*, 20–29.
51. Marchand, A.; Porcher, J.-M.; Turies, C.; Chadili, E.; Palluel, O.; Baudoin, P.; Betoulle, S.; Bado-Nilles, A. Evaluation of chlorpyrifos effects, alone and combined with lipopolysaccharide stress, on DNA integrity and immune responses of the three-spined stickleback, *Gasterosteus aculeatus*. *Ecotoxicol. Environ. Saf.* **2017**, *145*, 333–339.
52. Eder, K.J.; Leutenegger, C.M.; Wilson, B.W.; Werner, I. Molecular and cellular biomarker responses to pesticide exposure in juvenile Chinook salmon (*Oncorhynchus tshawytscha*). *Mar. Environ. Res.* **2004**, *58*, 809–813.
53. Sandahl, J.F.; Baldwin, D.H.; Jenkins, J.J.; Scholz, N.L. Comparative thresholds for acetylcholinesterase inhibition and behavioral impairment in coho salmon exposed to chlorpyrifos. *Environ. Toxicol. Chem.* **2005**, *24*, 136–145, doi:10.1897/04-195r.1.
54. Sandahl, J.F.; Baldwin, D.H.; Jenkins, J.J.; Scholz, N.L. Odor-evoked field potentials as indicators of sublethal neurotoxicity in juvenile coho salmon (*Oncorhynchus kisutch*) exposed to copper, chlorpyrifos, or esfenvalerate. *Can. J. Fish. Aquat. Sci.* **2004**, *61*, 404–413.

55. Hayman, N.T.; Hentschel, B.T.; Renick, V.C.; Anderson, T.W. Combined effects of flow speed and sub-lethal insecticide exposure on predator–prey interactions between the California killifish and an infaunal polychaete. *Ecotoxicology* **2019**, *28*, 117–131, doi:10.1007/s10646-018-2005-6.
56. Raibeemol, K.P.; Chitra, K.C. Hematological and biochemical changes in the freshwater fish, *Pseudotropheus maculatus* exposed to sublethal concentrations of chlorpyrifos. *Res. Rev.* **2018**, *8*, 108–116.
57. Xing, H.; Li, S.; Wang, Z.; Gao, X.; Xu, S.; Wang, X. Oxidative stress response and histopathological changes due to atrazine and chlorpyrifos exposure in common carp. *Pestic. Biochem. Physiol.* **2012**, *103*, 74–80.
58. Topal, A.; Atamanalp, M.; Oruç, E.; Demir, Y.; Beydemir, Ş.; Işık, A. In vivo changes in carbonic anhydrase activity and histopathology of gill and liver tissues after acute exposure to chlorpyrifos in rainbow trout. *Arch. Ind. Hyg. Toxicol.*, **2014**, *65*, 377385.
59. Jiang, J.; Wu, S.; Wang, Y.; An, X.; Cai, L.; Zhao, X.; Wu, C. Carbendazim has the potential to induce oxidative stress, apoptosis, immunotoxicity and endocrine disruption during zebrafish larvae development. *Toxicology In Vitro* **2015**, *29*, 1473–1481.
60. Liu, L.; Jiang, C.; Wu, Z.Q.; Gong, Y.X.; Wang, G.X. Toxic effects of three strobilurins (trifloxystrobin, azoxystrobin and kresoxim-methyl) on mRNA expression and antioxidant enzymes in grass carp (*Ctenopharyngodon idella*) juveniles. *Ecotoxicol. Environ. Saf.* **2013**, *98*, 297–302.
61. Cao, F.; Li, H.; Zhao, F.; Wu, P.; Qian, L.; Huang, L.; Pang, S.; Martyniuk, C.J.; Qiu, L. Parental exposure to azoxystrobin causes developmental effects and disrupts gene expression in F1 embryonic zebrafish (*Danio rerio*). *Sci. Total Environ.* **2019**, *646*, 595–605.
62. Cao, F.; Wu, P.; Huang, L.; Li, H.; Qian, L.; Pang, S.; Qiu, L. Short-term developmental effects and potential mechanisms of azoxystrobin in larval and adult zebrafish (*Danio rerio*). *Aquat. Toxicol.* **2018**, *198*, 129–140.
63. Zhang, L.; Hong, X.; Zhao, X.; Yan, S.; Ma, X.; Zha, J. Exposure to environmentally relevant concentrations of deltamethrin renders the Chinese rare minnow (*Gobiocypris rarus*) vulnerable to *Pseudomonas fluorescens* infection. *Sci. Total Environ.* **2020**, *715*, 136943, doi:10.1016/j.scitotenv.2020.136943.
64. *Draft Renewal Assessment Report (DRAR) prepared according to the Commission Regulation (EU) N° 1107/2009—DELTAMETHRIN*; European Commission (EC): Rapporteur, UK; Co-Rapporteur, Austria, 2018; Volume 3, B.9(AS), pp. 66–67.

**Table S8.** Acute toxicity data (96 h LC50) for data-rich relevant pesticides shown in SI Figure S2. All data were examined for validity and relevance by the Ecotox Centre, Dübendorf, Switzerland (<https://www.oekotoxzentrum.ch>) and can be obtained upon request from [info@oekotoxzentrum.ch](mailto:info@oekotoxzentrum.ch).

| Substance    | LC50 (µg/L) | Fish species                       | Family           | Order              |
|--------------|-------------|------------------------------------|------------------|--------------------|
| azoxystrobin | 470         | <i>Oncorhynchus mykiss</i>         | Salmonidae       | Salmoniformes      |
| azoxystrobin | 1100        | <i>Lepomis macrochirus</i>         | Centrarchidae    | Perciformes        |
| azoxystrobin | 1380        | <i>Oryzias latipes</i>             | Adrianichthyidae | Beloniformes       |
| azoxystrobin | 1600        | <i>Cyprinus carpio</i>             | Cyprinidae       | Cypriniformes      |
| azoxystrobin | 1650        | <i>Misgurnus anguillicaudatus</i>  | Cobitidae        | Cypriniformes      |
| azoxystrobin | 660         | <i>Cyprinodon variegatus</i>       | Cyprinodontidae  | Cyprinodontiformes |
| carbendazim  | 440         | <i>Cyprinus carpio</i>             | Cyprinidae       | Cypriniformes      |
| carbendazim  | 1080        | <i>Danio rerio</i>                 | Cyprinidae       | Cypriniformes      |
| carbendazim  | 7           | <i>Ictalurus punctatus</i>         | Ictaluridae      | Siluriformes       |
| carbendazim  | 100         | <i>Oncorhynchus mykiss</i>         | Salmonidae       | Salmoniformes      |
| carbendazim  | 390         | <i>Salmo trutta</i>                | Salmonidae       | Salmoniformes      |
| chlorpyrifos | 1.3         | <i>Leuresthes tenuis</i>           | Atherinopsidae   | Atheriniformes     |
| chlorpyrifos | 1.3         | <i>Menidia peninsulae</i>          | Atherinopsidae   | Atheriniformes     |
| chlorpyrifos | 1.7         | <i>Menidia menidia</i>             | Atherinopsidae   | Atheriniformes     |
| chlorpyrifos | 1.78        | <i>Lepomis macrochirus</i>         | Centrarchidae    | Perciformes        |
| chlorpyrifos | 4.2         | <i>Menidia beryllina</i>           | Atherinopsidae   | Atheriniformes     |
| chlorpyrifos | 4.7         | <i>Pungitius pungitius</i>         | Gasterosteidae   | Gasterosteiformes  |
| chlorpyrifos | 8.5         | <i>Oncorhynchus mykiss</i>         | Salmonidae       | Salmoniformes      |
| chlorpyrifos | 8.5         | <i>Gasterosteus aculeatus</i>      | Gasterosteidae   | Gasterosteiformes  |
| chlorpyrifos | 10          | <i>Leuciscus Idus</i>              | Cyprinidae       | Cypriniformes      |
| chlorpyrifos | 12.5        | <i>Sander vitreus</i>              | Percidae         | Perciformes        |
| chlorpyrifos | 130         | <i>Pimephales promelas</i>         | Cyprinidae       | Cypriniformes      |
| chlorpyrifos | 136         | <i>Cyprinodon variegatus</i>       | Cyprinodontidae  | Cyprinodontiformes |
| chlorpyrifos | 250         | <i>Oryzias latipes</i>             | Adrianichthyidae | Beloniformes       |
| chlorpyrifos | 250         | <i>Rutilus rutilus</i>             | Cyprinidae       | Cypriniformes      |
| chlorpyrifos | 520         | <i>Opsanus beta</i>                | Batrachoididae   | Batrachoidiformes  |
| chlorpyrifos | 806         | <i>Ictalurus punctatus</i>         | Ictaluridae      | Siluriformes       |
| cyhalothrin  | 0.078       | <i>Leuciscus Idus</i>              | Cyprinidae       | Cypriniformes      |
| cyhalothrin  | 0.16        | <i>Ictalurus punctatus</i>         | Ictaluridae      | Siluriformes       |
| cyhalothrin  | 0.21        | <i>Lepomis macrochirus</i>         | Centrarchidae    | Perciformes        |
| cyhalothrin  | 0.24        | <i>Oncorhynchus mykiss</i>         | Salmonidae       | Salmoniformes      |
| cyhalothrin  | 0.49        | <i>Gasterosteus aculeatus</i>      | Gasterosteidae   | Gasterosteiformes  |
| cyhalothrin  | 0.78        | <i>Danio rerio</i>                 | Cyprinidae       | Cypriniformes      |
| cyhalothrin  | 1.6         | <i>Oryzias latipes</i>             | Adrianichthyidae | Beloniformes       |
| cyhalothrin  | 0.7         | <i>Pimephales promelas</i>         | Cyprinidae       | Cypriniformes      |
| cyhalothrin  | 0.807       | <i>Cyprinodon variegatus</i>       | Cyprinodontidae  | Cyprinodontiformes |
| cypermethrin | 0.4         | <i>Scardinius erythrophthalmus</i> | Cyprinidae       | Cypriniformes      |
| cypermethrin | 0.43        | <i>Cnesterodon decemmaculatus</i>  | Poeciliidae      | Cyprinodontiformes |
| cypermethrin | 1.2         | <i>Salmo trutta</i>                | Salmonidae       | Salmoniformes      |
| cypermethrin | 2.1         | <i>Oreochromis niloticus</i>       | Cichlidae        | Cichliformes       |
| cypermethrin | 1.47        | <i>Galaxius maculatus</i>          | Galaxiidae       | Osmeriformes       |
| cypermethrin | 1.98        | <i>Pseudaphritis urvillii</i>      | Pseudaphritidae  | Perciformes        |
| cypermethrin | 0.71        | <i>Cyprinus carpio</i>             | Cyprinidae       | Cypriniformes      |
| cypermethrin | 1.77        | <i>Brachidanio rerio</i>           | Cyprinidae       | Cypriniformes      |
| cypermethrin | 1.11        | <i>Lepomis macrochirus</i>         | Centrarchidae    | Perciformes        |
| cypermethrin | 0.39        | <i>Oncorhynchus mykiss</i>         | Salmonidae       | Salmoniformes      |
| cypermethrin | 3.82        | <i>Oryzias latipes</i>             | Adrianichthyidae | Beloniformes       |
| cypermethrin | 1.37        | <i>Pimephales promelas</i>         | Cyprinidae       | Cypriniformes      |
| cypermethrin | 2.4         | <i>Cyprinodon variegatus</i>       | Cyprinodontidae  | Cyprinodontiformes |
| diazinon     | 90          | <i>Oncorhynchus mykiss</i>         | Salmonidae       | Salmoniformes      |
| diazinon     | 168         | <i>Lepomis macrochirus</i>         | Centrarchidae    | Perciformes        |
| diazinon     | 770         | <i>Salvelinus fontinalis</i>       | Salmonidae       | Salmoniformes      |
| diazinon     | 1470        | <i>Cyprinodon variegatus</i>       | Cyprinodontidae  | Cyprinodontiformes |
| diazinon     | 1600        | <i>Jordanella floridae</i>         | Cyprinodontidae  | Cyprinodontiformes |
| diazinon     | 4300        | <i>Pimephales promelas</i>         | Cyprinidae       | Cypriniformes      |

|          |       |                                |                  |                    |
|----------|-------|--------------------------------|------------------|--------------------|
| diazinon | 8900  | <i>Entosphenus tridentatus</i> | Petromyzontidae  | Petromyzontiformes |
| diuron   | 500   | <i>Morone saxatilis</i>        | Moronidae        | Perciformes        |
| diuron   | 710   | <i>Oncorhynchus clarki</i>     | Salmonidae       | Salmoniformes      |
| diuron   | 1100  | <i>Salvelinus namaycush</i>    | Salmonidae       | Salmoniformes      |
| diuron   | 2800  | <i>Lepomis macrochirus</i>     | Centrarchidae    | Perciformes        |
| diuron   | 6300  | <i>Mugil cephalus</i>          | Mugilidae        | Mugiliformes       |
| diuron   | 6700  | <i>Cyprinodon variegatus</i>   | Cyprinodontidae  | Cyprinodontiformes |
| diuron   | 7700  | <i>Pimaphales promelas</i>     | Cyprinidae       | Cypriniformes      |
| diuron   | 7800  | <i>Oryzias melastigma</i>      | Adrianichthyidae | Beloniformes       |
| diuron   | 14700 | <i>Oncorhynchus mykiss</i>     | Salmonidae       | Salmoniformes      |

**Table S9.** Fish species resident in small to medium-sized streams in Switzerland and their current status (NAWA TREND Monitoring [1,2]).

| Species                            | Red List Status       |
|------------------------------------|-----------------------|
| <i>Chondrostoma nasus</i>          | Critically endangered |
| <i>Salmo trutta lacustris</i>      | Endangered            |
| <i>Lampetra planeri</i>            | Endangered            |
| <i>Thymallus thymallus</i>         | Vulnerable            |
| <i>Alburnoides bipunctatus</i>     | Vulnerable            |
| <i>Leuciscus souffia</i>           | Vulnerable            |
| <i>Cyprinus carpio</i>             | Vulnerable            |
| <i>Anguilla anguilla</i>           | Vulnerable            |
| <i>Cobitis taenia</i>              | Vulnerable            |
| <i>Salmo trutta fario</i>          | Near threatened       |
| <i>Gasterosteus aculeatus</i>      | Near threatened       |
| <i>Cottus gobio</i>                | Near threatened       |
| <i>Barbus barbus</i>               | Near threatened       |
| <i>Perca fluviatilis</i>           | Least concern         |
| <i>Esox lucius</i>                 | Least concern         |
| <i>Leuciscus cephalus</i>          | Least concern         |
| <i>Leuciscus leuciscus</i>         | Least concern         |
| <i>Rutilus rutilus</i>             | Least concern         |
| <i>Scardinius erythrophthalmus</i> | Least concern         |
| <i>Tinca tinca</i>                 | Least concern         |
| <i>Lota lota</i>                   | Least concern         |
| <i>Gobio gobio</i>                 | Least concern         |
| <i>Phoxinus phoxinus</i>           | Least concern         |
| <i>Barbatula barbatula</i>         | Least concern         |
| <i>Gymnocephalus cernuus</i>       | Least concern         |

- 1 Kirchhofer, A.; Breitenstein, M.; Zaugg, B. Rote Liste der Fische und Rundmauler der Schweiz. Umwelt-Vollzug Nr. 0734; Bundesamt für Umwelt, Bern, und Schweizer Zentrum für die Kartographie der Fauna, Neuenburg, Switzerland. **2007**; p. 64.
- 2 Spalinger, L.; Dönni, W.; Guthruf, J. NAWA TREND BIOLOGIE 2. Kampagne (2015) Fachbericht Fische, Report; Bundesamt für Umwelt: Bern, Switzerland, **2017**; p. 75.

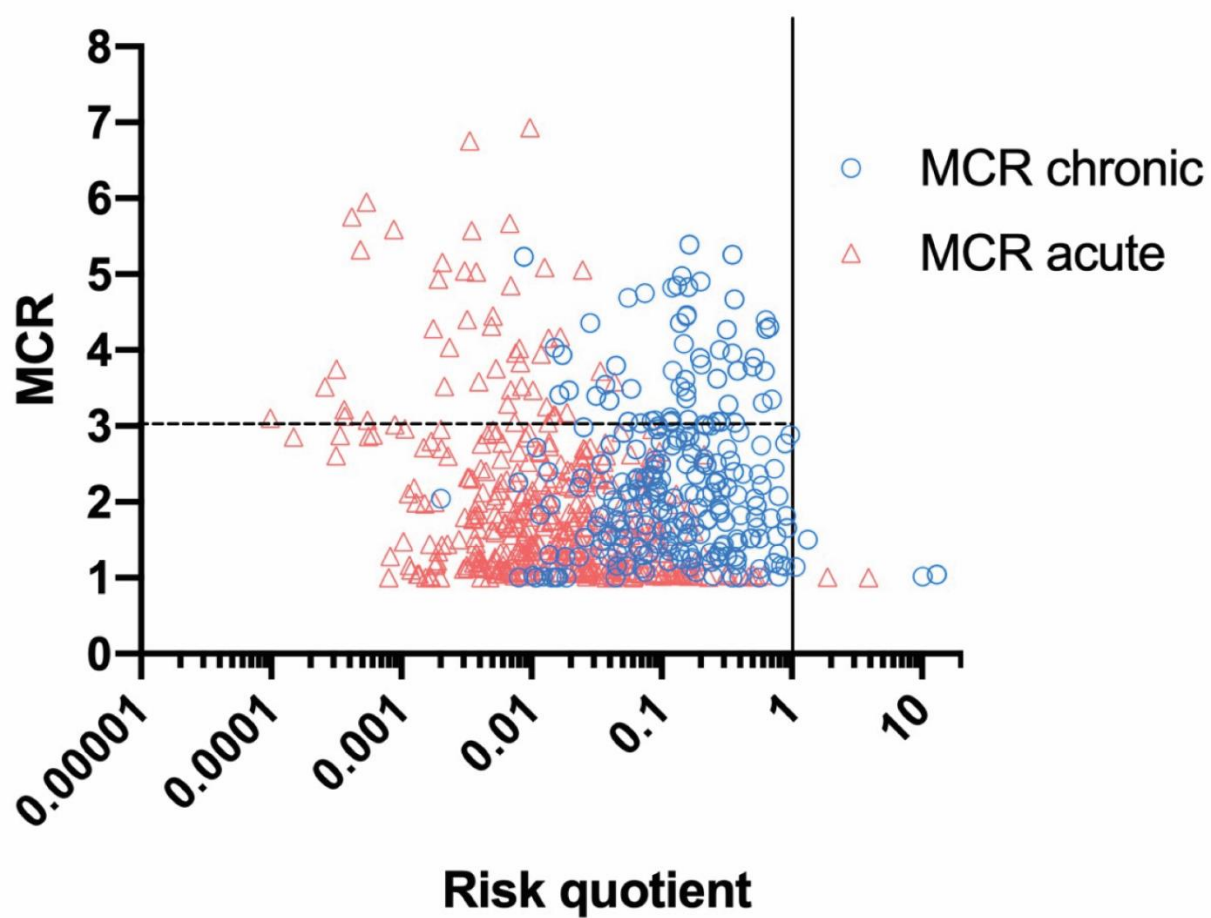

**Figure S1.** Maximum cumulative ratios (MCR) as a function of the mixture risk quotient of pesticides detected in water samples from monitoring campaigns 2012-2018. The MCR corresponds to the number of pesticides in the sample that drive the mixture risk quotient.

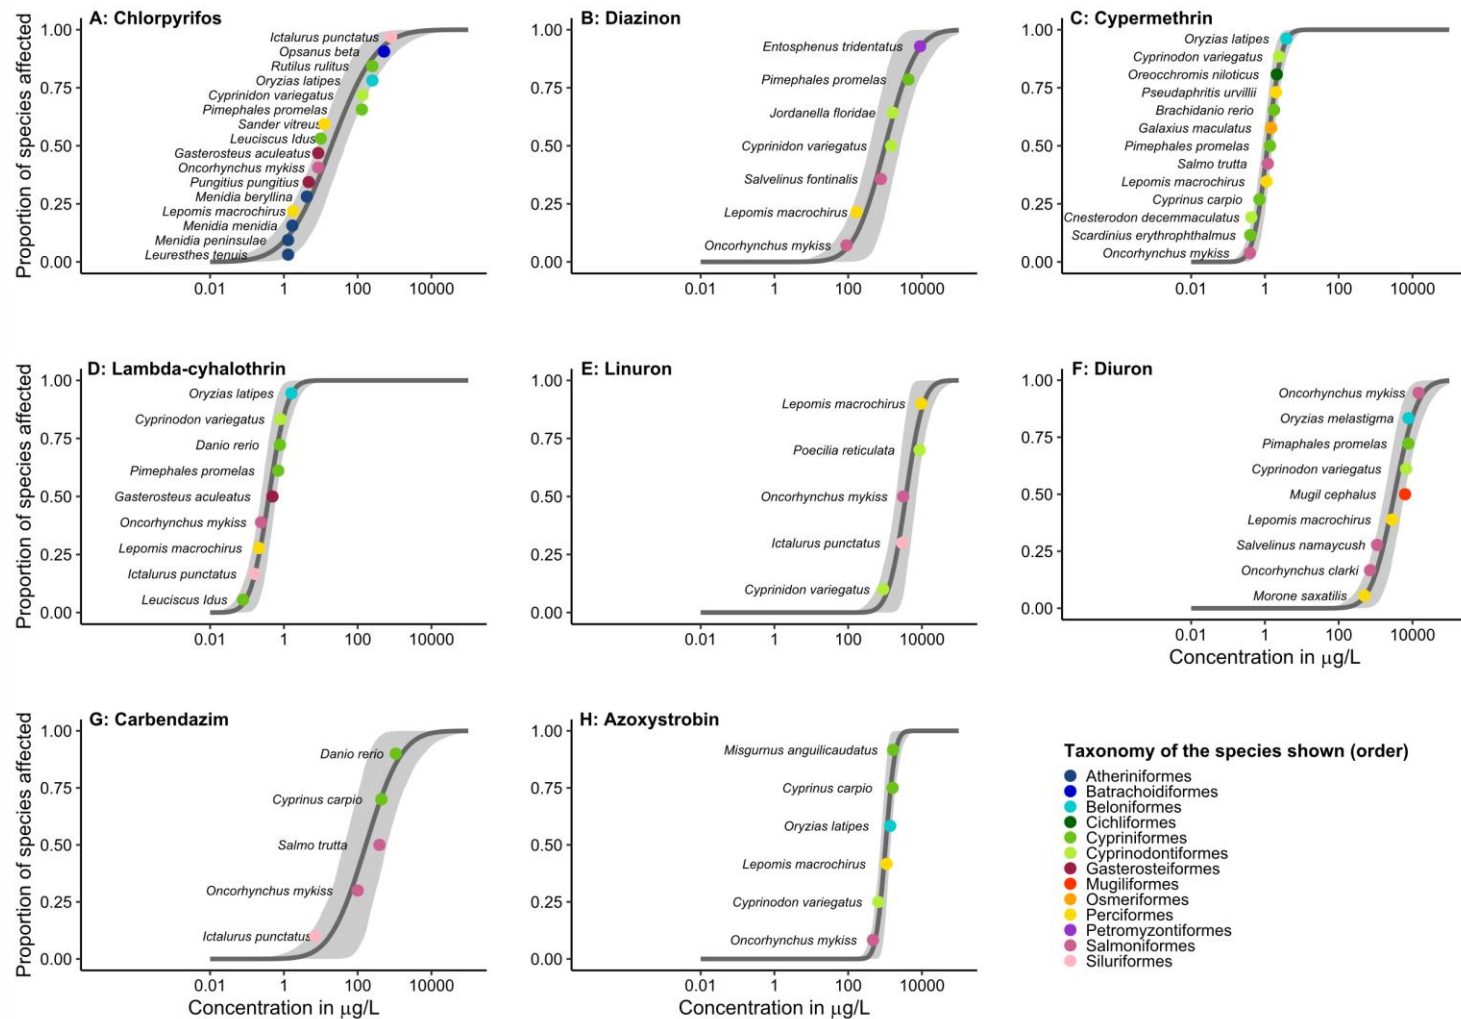

**Figure S2.** Species sensitivity distributions (SSDs) for data-rich relevant pesticides.
